# Supplementary material
Source: Springer Nature journal article supplement (https://www.springermedizin.de/resource/supplementary/12955_2013_1320_MOESM1_ESM.pdf/9559564)

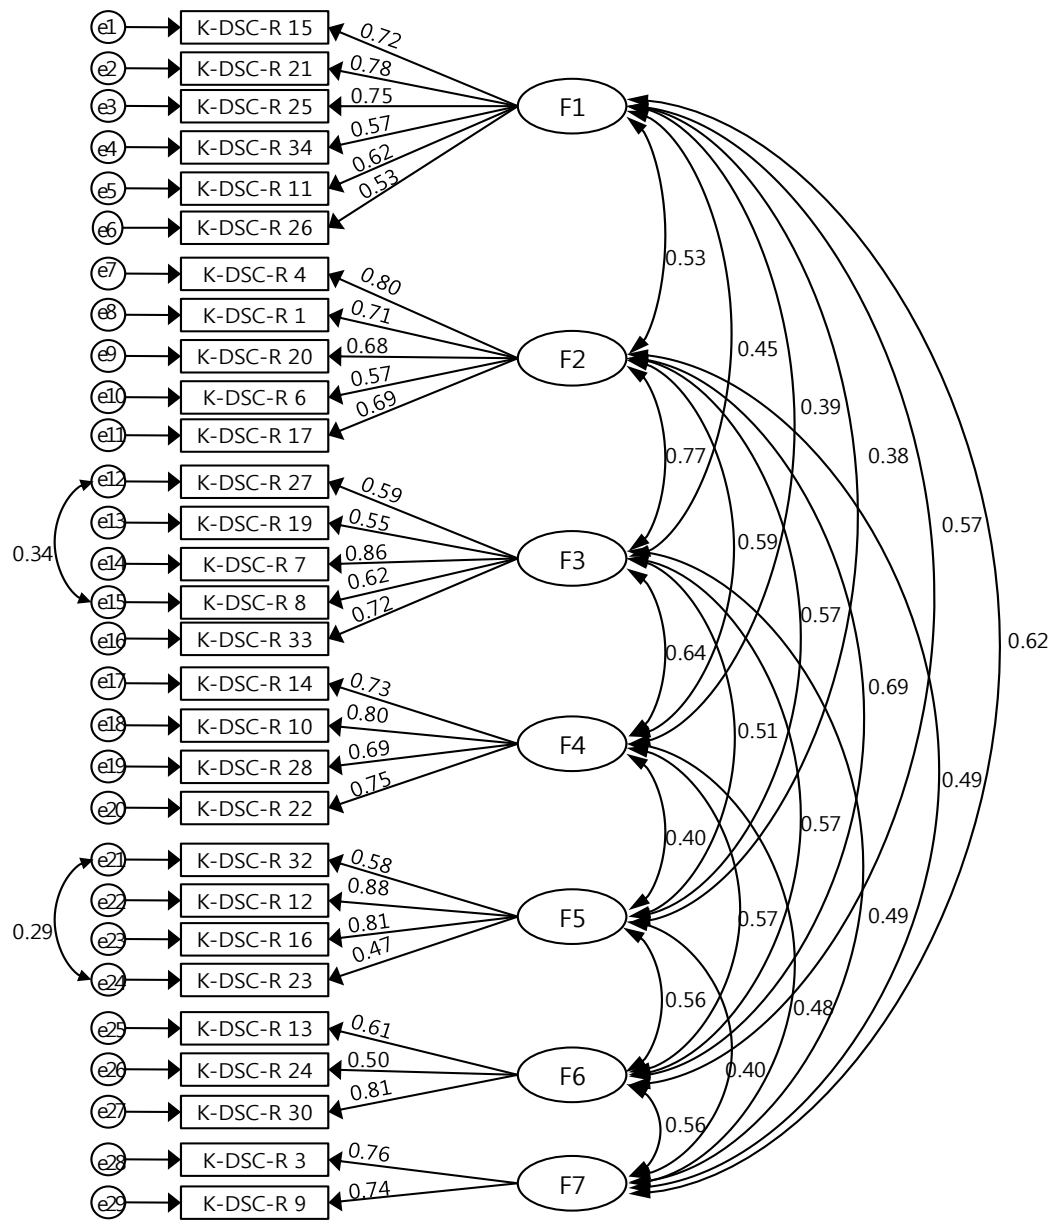

Supplement: MOESM1 [file 9559564]
